# Supplementary material for: 2D Microporous Covalent Organic Frameworks as Cobalt Nanoparticle Supports for Electrocatalytic Hydrogen Evolution Reaction
Source: MDPI journal article supplement (doi:10.3390/cryst12070880), 2022-06-21
Supplement: s1 [file s1]

# Supplemental information

## 2D Microporous Covalent Organic Frameworks as Cobalt Nanoparticle Supports for Electrocatalytic Hydrogen Evolution Reaction

Jialong Song <sup>1,2§</sup>, Li Liao <sup>1§</sup>, Zerong Zhang <sup>1</sup>, Yusran Yusran <sup>1</sup>, Rui Wang <sup>1</sup>, Jing Fang <sup>1</sup>, Yaozu  
Liu <sup>1</sup>, Yu Hou <sup>2</sup>, Yujie Wang <sup>1,\*</sup> and Qianrong Fang <sup>1,\*</sup>

*<sup>1</sup>State Key Laboratory of Inorganic Synthesis and Preparative Chemistry,  
Jilin University, Changchun 130012, P. R. China*

*E-mail: qrfang@jlu.edu.cn or wyujie@jlu.edu.cn*

*<sup>2</sup>School of Chemical Engineering and New Energy Materials,  
Zhuhai College of Science and Technology, Zhuhai 519041, P. R. China.*

## Table of contents

|                   |                                                        |        |
|-------------------|--------------------------------------------------------|--------|
| <b>Section S1</b> | Synthesis and characterization                         | S3-4   |
| <b>Section S2</b> | FT-IR spectra                                          | S5     |
| <b>Section S3</b> | TGA curves                                             | S5-6   |
| <b>Section S4</b> | Nitrogen adsorption                                    | S6-7   |
| <b>Section S5</b> | SEM mapping for loading of cobalt                      | S7-8   |
| <b>Section S6</b> | Electrochemical HER performance                        | S8-10  |
| <b>Section S7</b> | PXRD patterns and structures                           | S11-14 |
| <b>Section S8</b> | Unit cell parameters and fractional atomic coordinates | S15-19 |
| <b>Section S9</b> | References                                             | S20    |

## Section S1. Synthesis and characterization

Scheme S1. Synthesis of JUC-624.

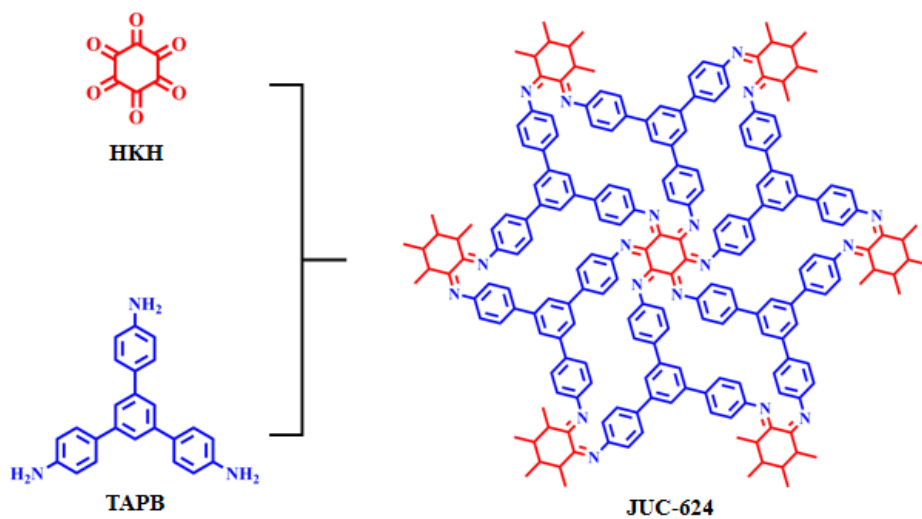

Scheme S2. Synthesis of JUC-625.

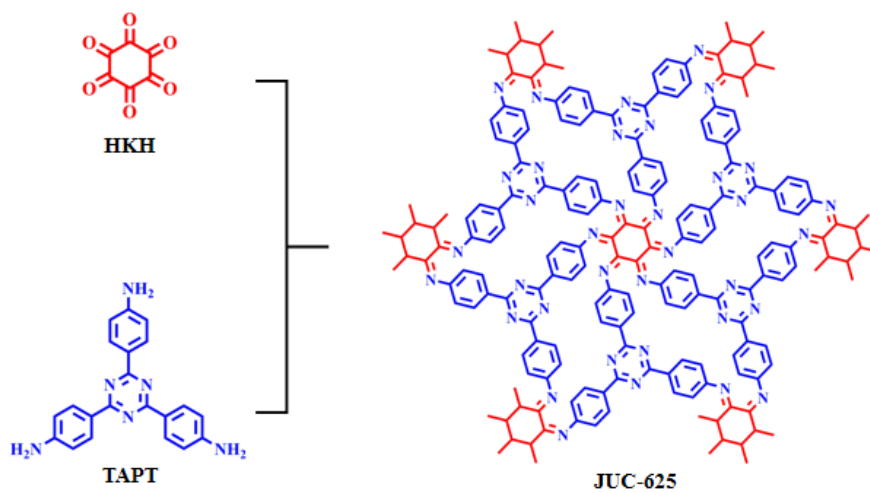

**Scheme S3.** Synthesis of CoNPs@JUC-624 and CoNPs@JUC-625.

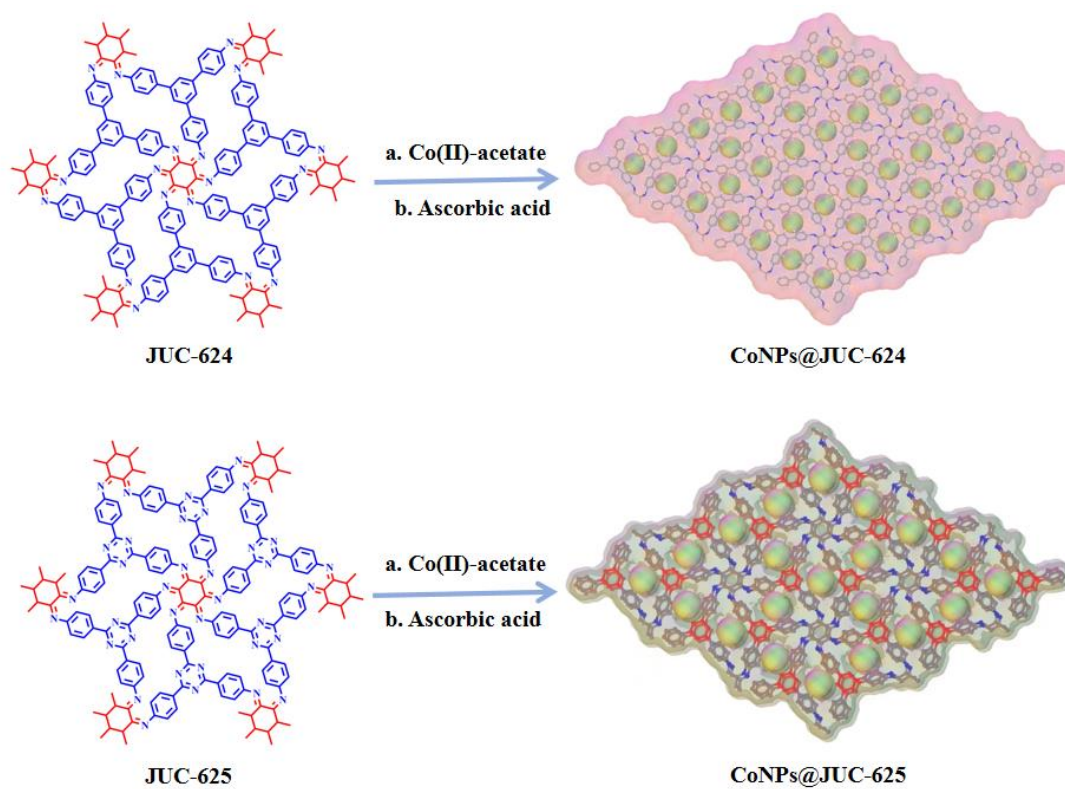

**Scheme S4.** Electrochemical measurements.

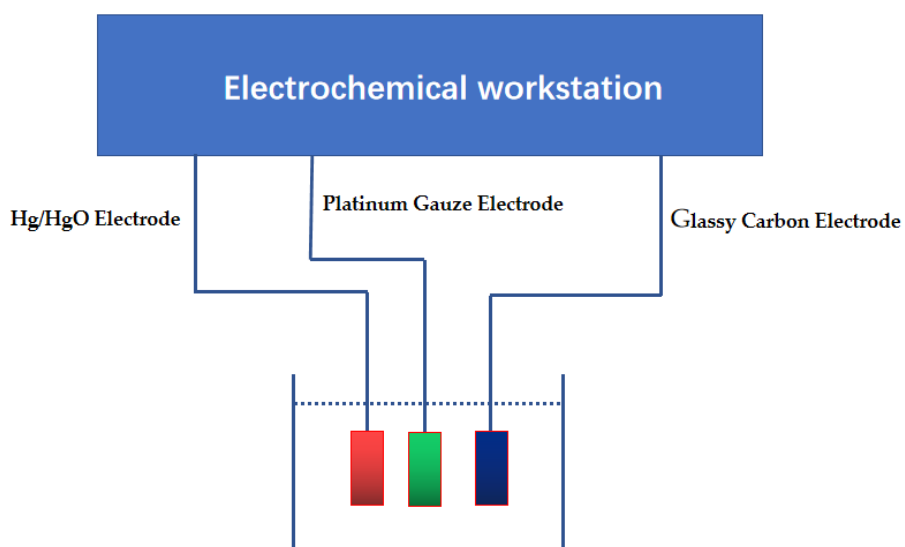

## Section S2. FT-IR spectra

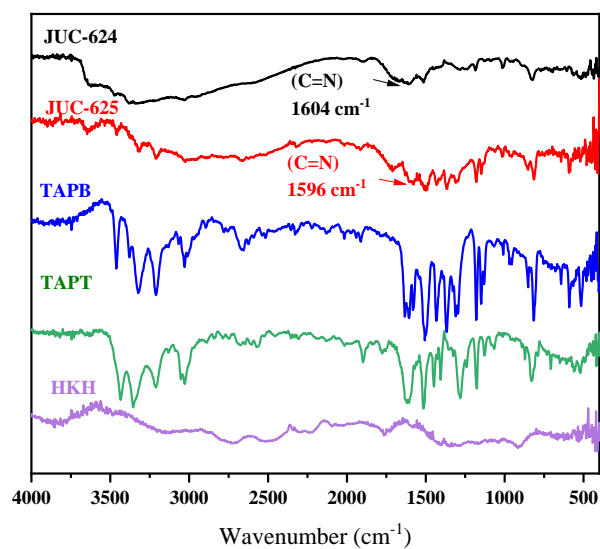

**Figure S1.** FT-IR spectra of JUC-624 (black), JUC-625 (red), TAPB (blue), TAPT (green), and HKH (purple).

## Section S3. TGA curves

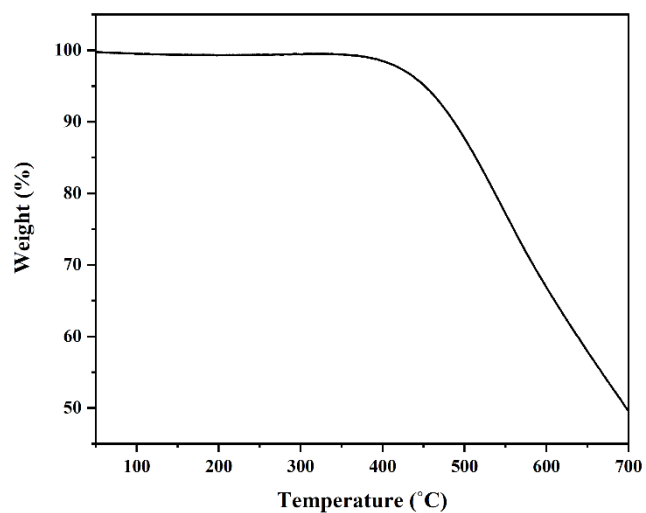

**Figure S2.** TGA curve of JUC-624.

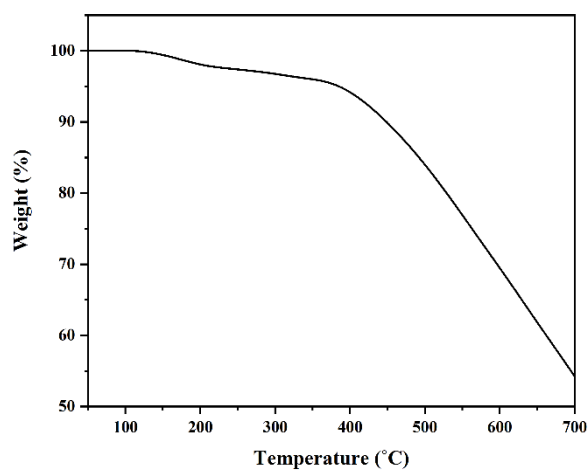

**Figure S3.** TGA curve of JUC-625.

## Section S4. Nitrogen adsorption and pore size distribution

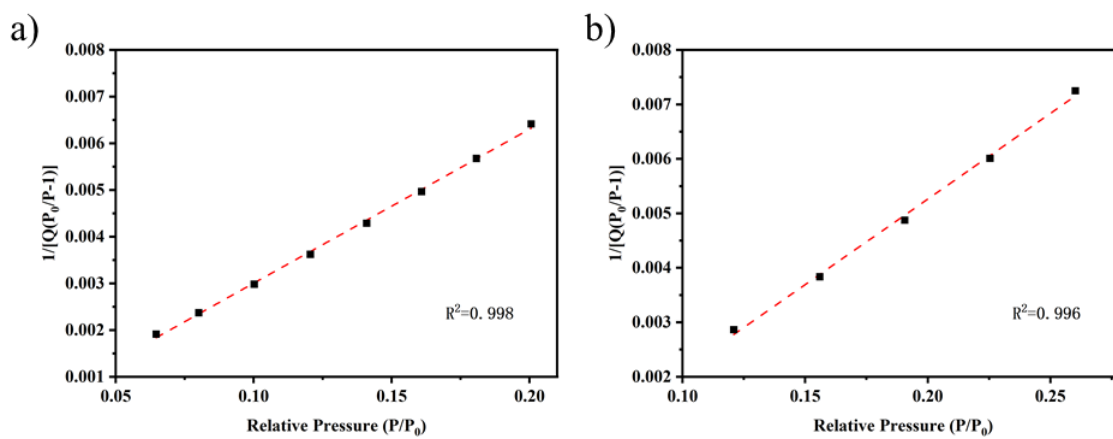

**Figure S4.** BET plots of JUC-624 (a) and JUC-625 (b) calculated from N<sub>2</sub> adsorption isotherm at 77 K.

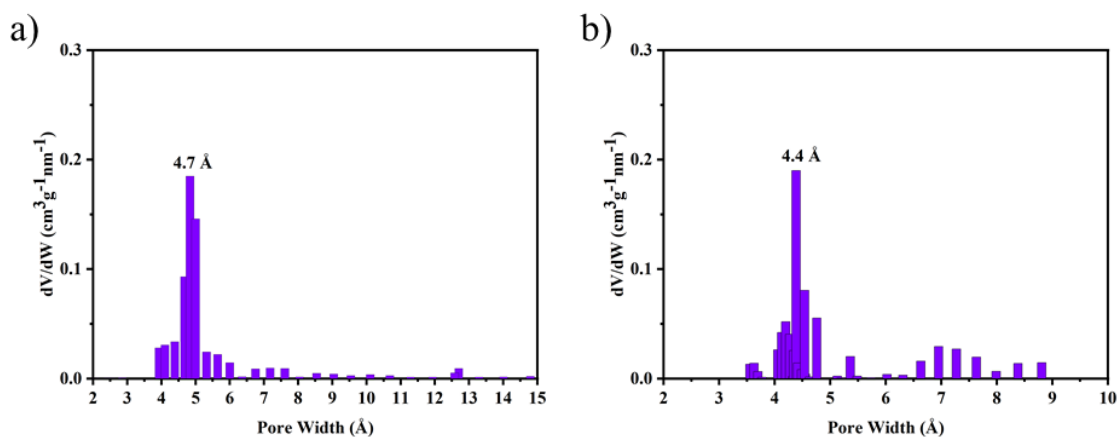

**Figure S5.** Pore-size distribution of JUC-624 (a) and JUC-625 (b) calculated by fitting on the NLDFT model to the adsorption data.

## Section S5. SEM mapping for loading of cobalt

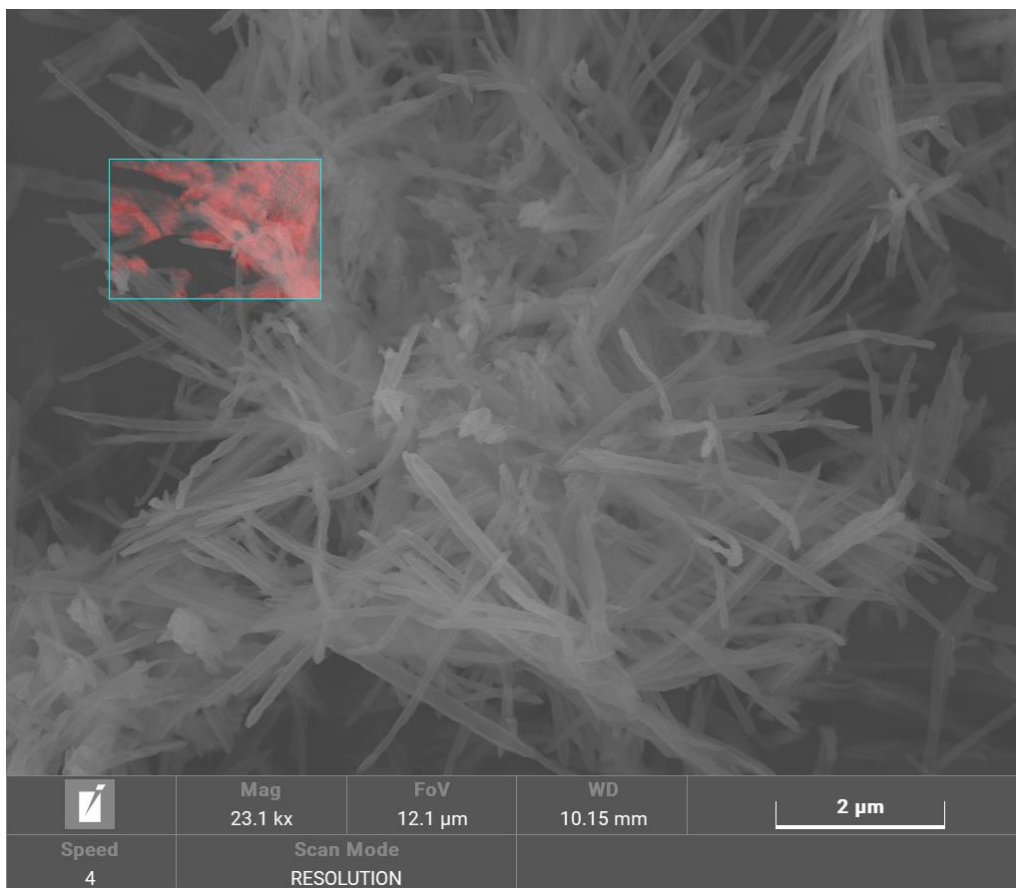

**Figure S6.** SEM-EDS mapping of Co(II)NPs@JUC-624.

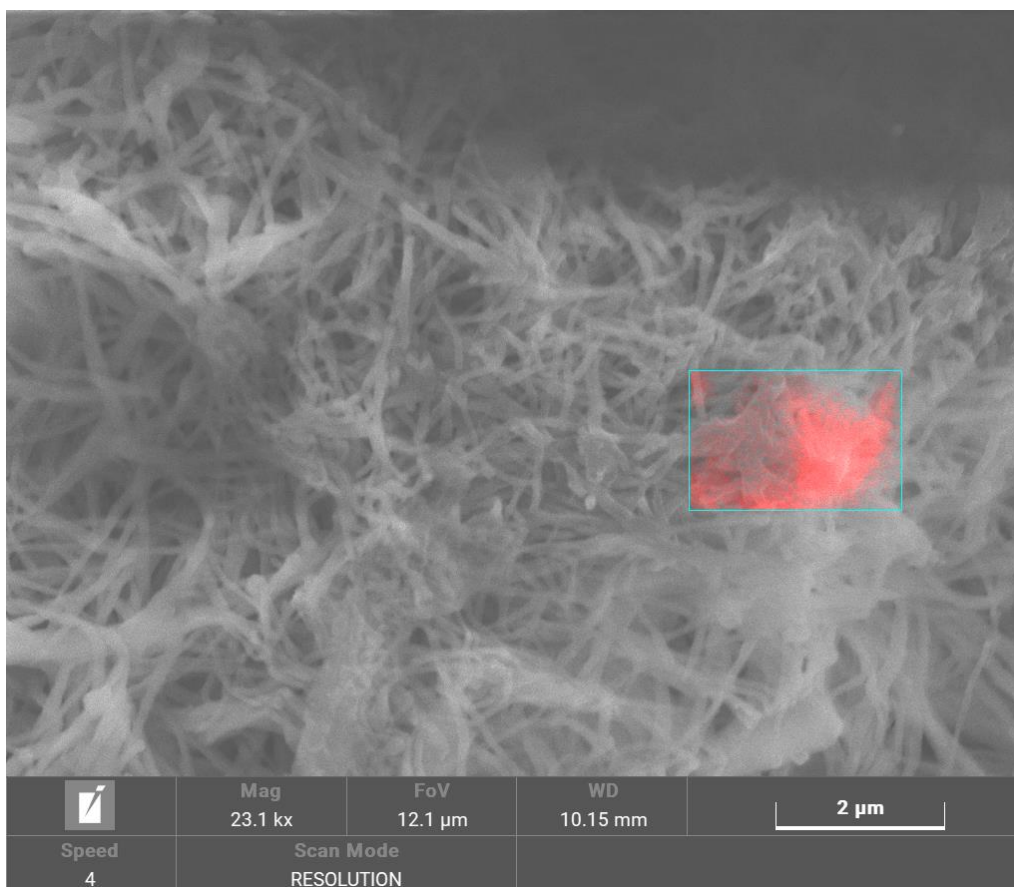

**Figure S7.** SEM-EDS mapping of Co(II)NPs@JUC-625.

## Section S6. Electrochemical HER performance

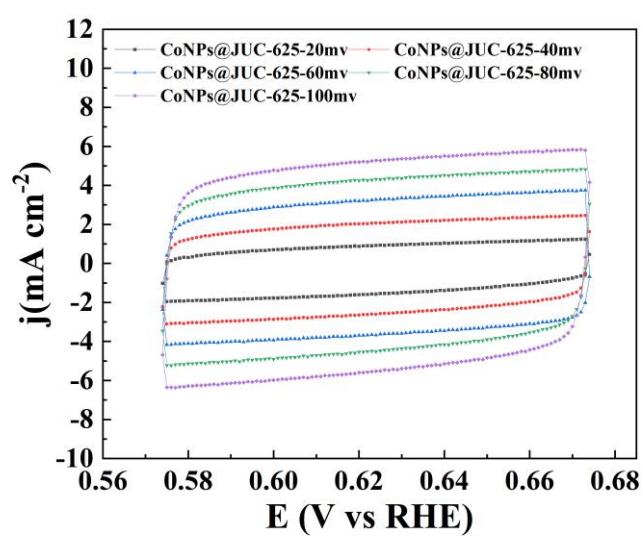

**Figure S8.** CV curves at different scan of CoNPs@JUC-625.



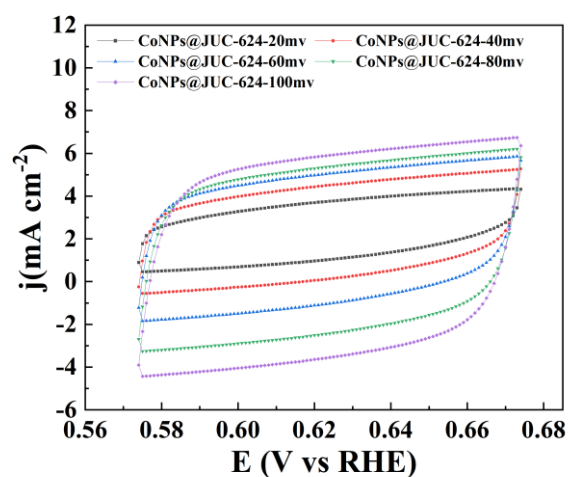

Figure S9. CV curves at different scan of CoNPs@JUC-624.

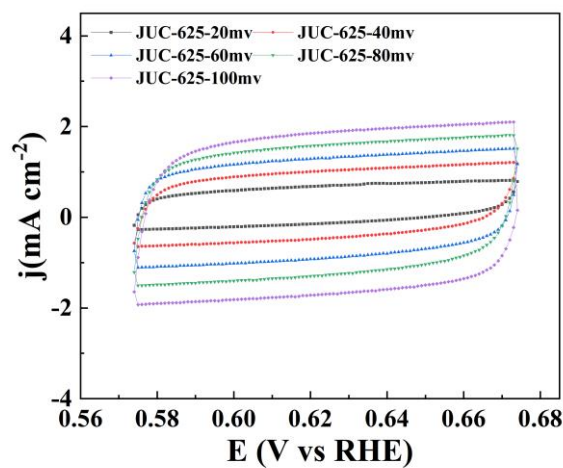

Figure S10. CV curves at different scan of JUC-625.

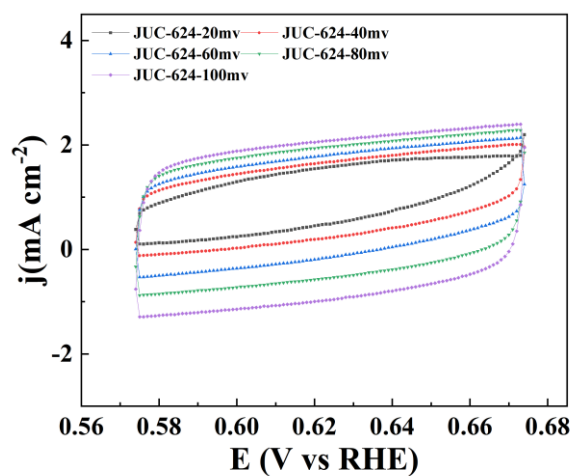

Figure S11. CV curves at different scan of JUC-624.

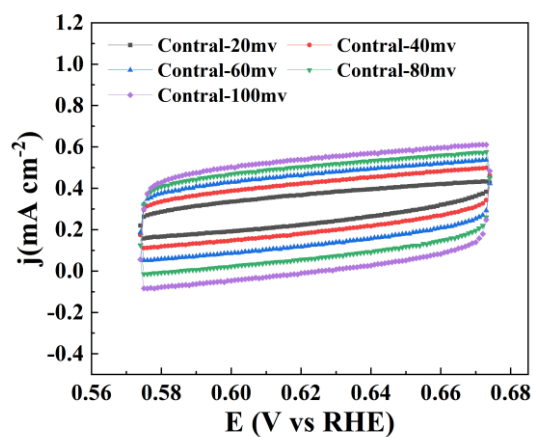

**Figure S12.** CV curves at different scan rates of GC.

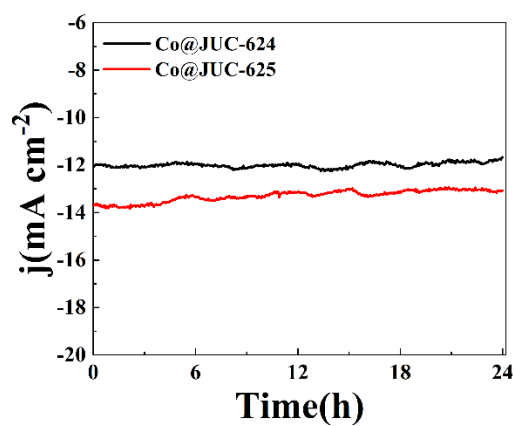

**Figure S13.** i-t curves of CoNPs@JUC-624 and CoNPs@JUC-625 for 24 h.

**Table S1.** Summary of COF-based materials as electrocatalysts for the HER in the literature.

| COF-based electrocatalysts | Electrolyte                          | Loading<br>[mg cm <sup>-2</sup> ] | $\eta_{j=10}$ [mV vs<br>RHE] | b [mV<br>dec <sup>-1</sup> ] | Ref.      |
|----------------------------|--------------------------------------|-----------------------------------|------------------------------|------------------------------|-----------|
| CoNPs@JUC-624              | 1.0 M KOH                            | 0.142                             | 176                          | 190                          | This work |
| CoNPs@JUC-625              | 1.0 M KOH                            | 0.142                             | 146                          | 186                          | This work |
| TpPAM-COF                  | 0.5 M H <sub>2</sub> SO <sub>4</sub> | –                                 | 250                          | 106                          | 1         |
| COF/rGO-Ru                 | 1.0 M KOH                            |                                   | 42                           | 46                           | 2         |
| Cu@2DCCOF1                 | –                                    | –                                 | 541                          | 130                          | 3         |
| Ru@COF                     | 1.5 M H <sub>2</sub> SO <sub>4</sub> | 0.305                             | 212                          | 75                           | 4         |
| C6-TRZ-TFP COF             | 0.5 m H <sub>2</sub> SO <sub>4</sub> | 0.035                             | 200                          | 82                           | 5         |

## Section S7. PXRD patterns and structures

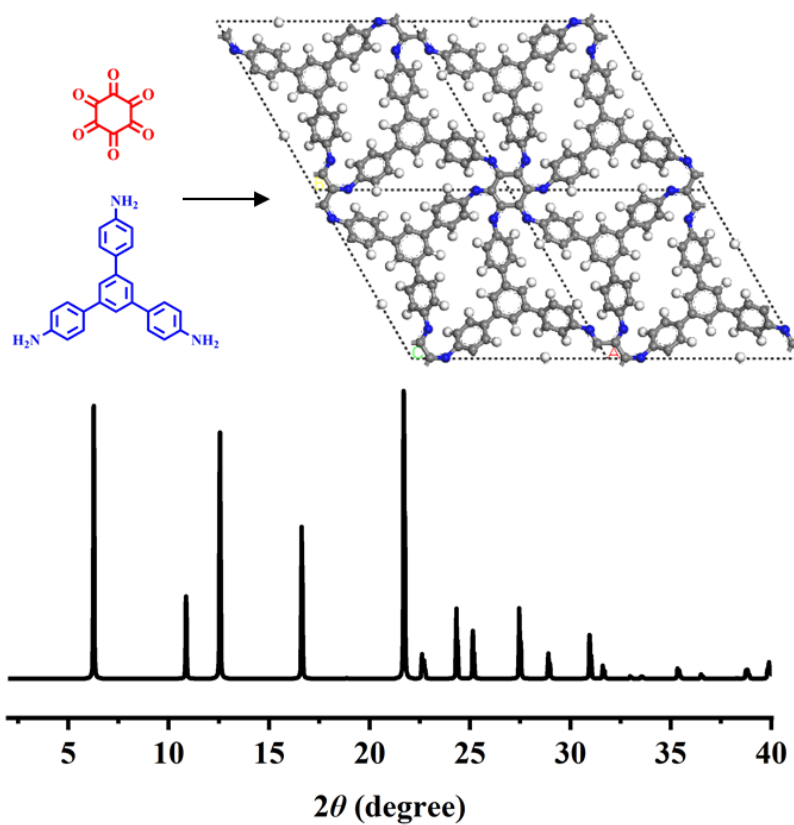

**Figure S14.** Calculated PXRD pattern of JUC-624 based on the AA-stacked **kgd** net.

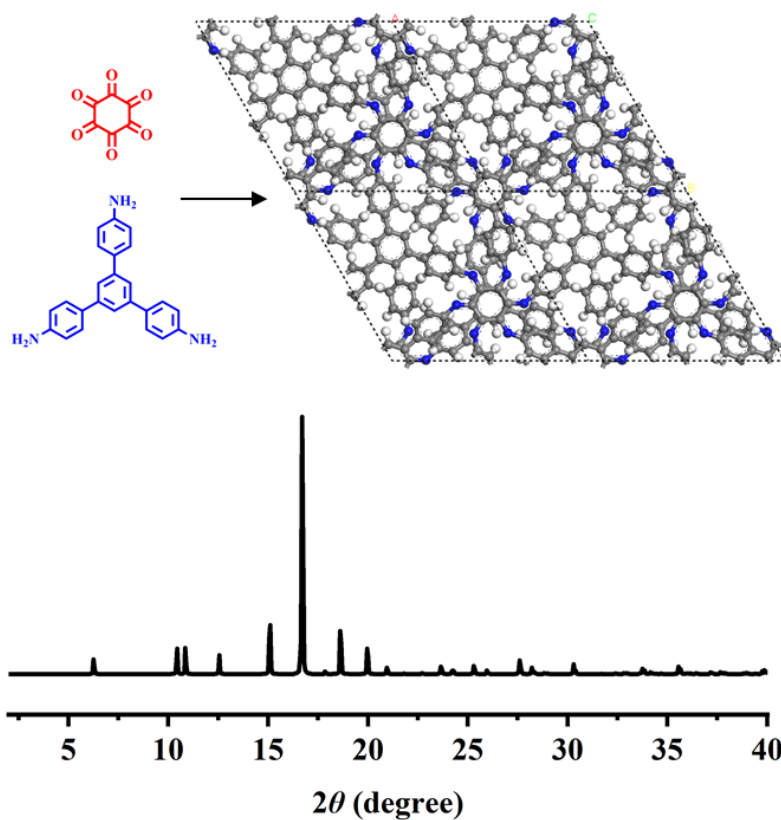

**Figure S15.** Calculated PXRD pattern of JUC-624 based on the AB-stacked **kgd** net.

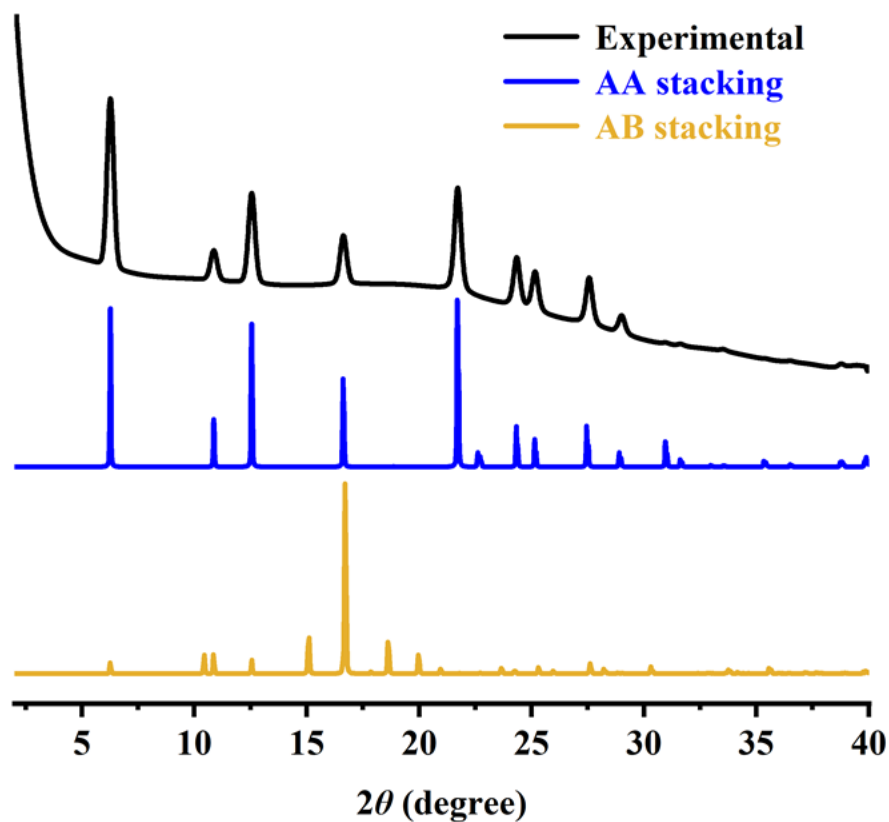

**Figure S16.** The comparison of PXRD patterns for JUC-624: calculated based on AA-stacked **kgd** net (blue), AB-stacked **kgd** net (yellow), and experimental (black).

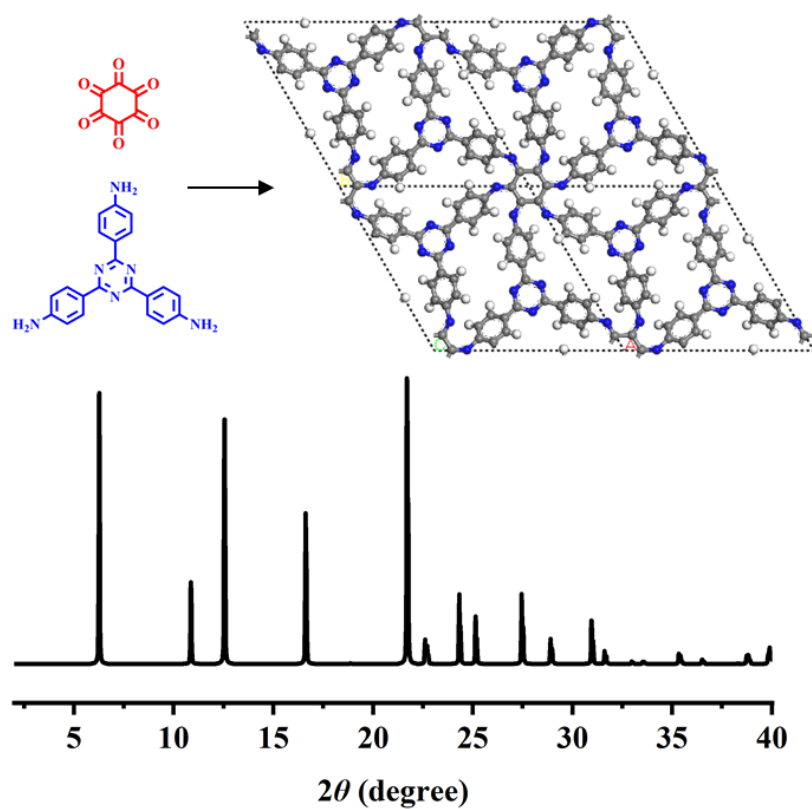

**Figure S17.** Calculated PXRD pattern of JUC-625 based on the AA-stacked **kgd** net.

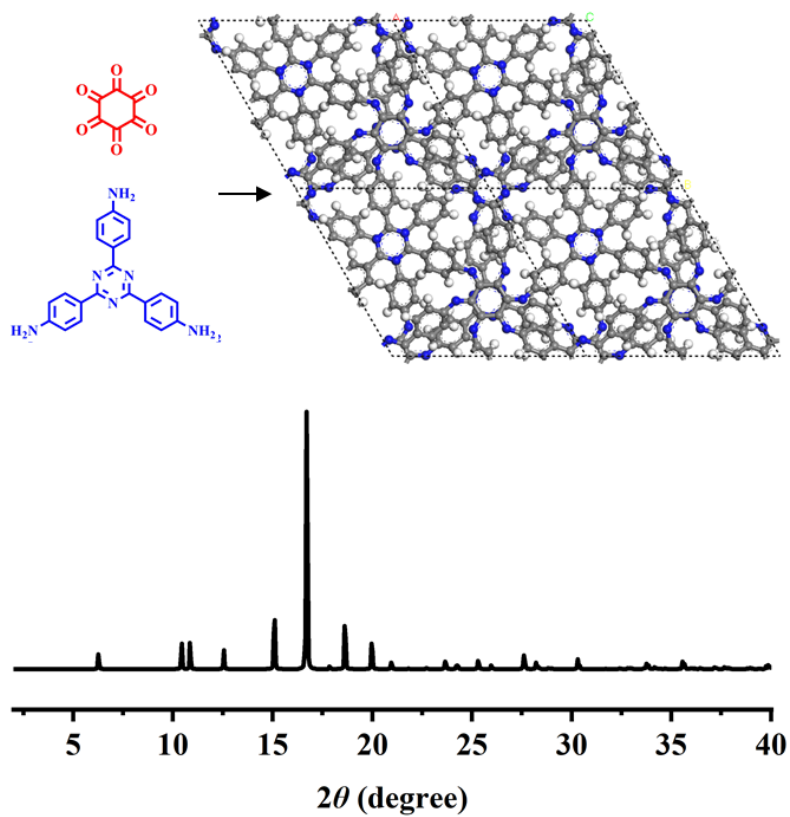

**Figure S18.** Calculated PXRD pattern of JUC-625 based on the AB-stacked **kgd** net.

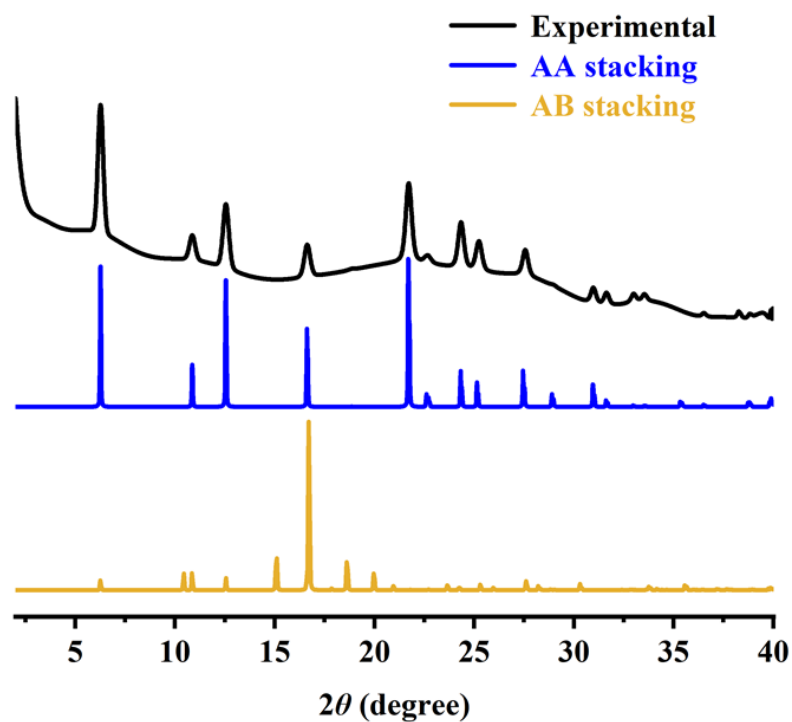

**Figure S19.** The comparison of PXRD patterns for JUC-625: calculated based on AA-stacked **kgd** net (blue), AB-stacked **kgd** net (yellow), and experimental (black).

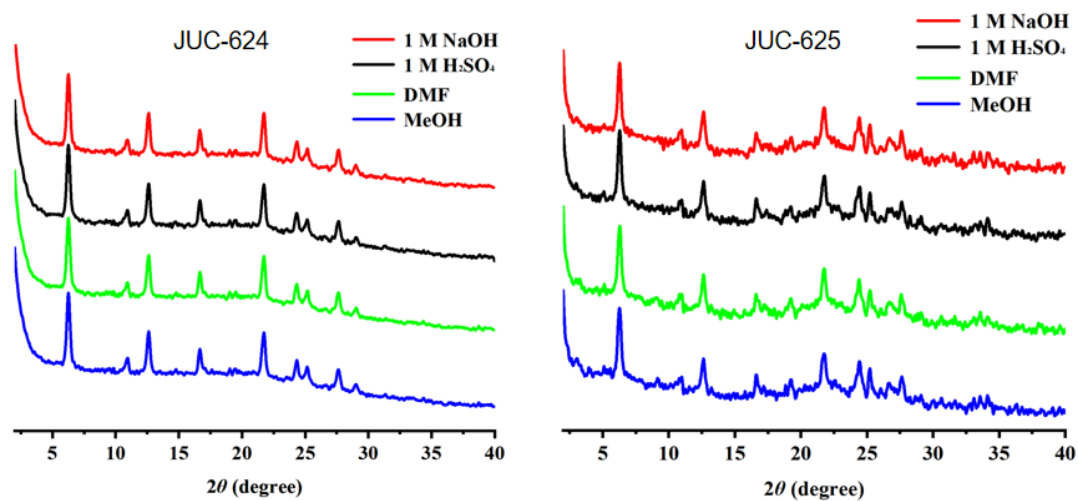

**Figure S20.** PXRD patterns of JUC-624 and JUC-625 after 24 hrs treatment in different solvents.



## Section S8: Unit cell parameters and fractional atomic coordinates

**Table S2.** Unit cell parameters and fractional atomic coordinates for JUC-624 calculated based on the AA-stacked **kgd** net.

| Space group          |         | $P6$                                                                                                |          |
|----------------------|---------|-----------------------------------------------------------------------------------------------------|----------|
| Calculated unit cell |         | $a = b = 16.2889 \text{ \AA}, c = 4.093 \text{ \AA}, \alpha = \beta = 90^\circ, \gamma = 120^\circ$ |          |
| Measured unit cell   |         | $a = b = 16.2798 \text{ \AA}, c = 4.102 \text{ \AA}, \alpha = \beta = 90^\circ, \gamma = 120^\circ$ |          |
| Pawley refinement    |         | $R_p = 2.58\%, R_{wp} = 3.53\%$                                                                     |          |
| atoms                | x       | y                                                                                                   | z        |
| C1                   | 0.08945 | 0.09428                                                                                             | 0.05663  |
| N2                   | 0.00424 | 0.83007                                                                                             | 0.07566  |
| C3                   | 0.14863 | 0.84026                                                                                             | -0.17939 |
| C4                   | 0.21432 | 0.80911                                                                                             | -0.19362 |
| C5                   | 0.1987  | 0.72792                                                                                             | -0.01989 |
| C6                   | 0.11463 | 0.67864                                                                                             | 0.16407  |
| C7                   | 0.05352 | 0.71504                                                                                             | 0.19765  |
| C8                   | 0.0729  | 0.79944                                                                                             | 0.04257  |
| C9                   | 0.23651 | 0.59993                                                                                             | -0.03113 |
| C10                  | 0.3029  | 0.5686                                                                                              | -0.03017 |
| H11                  | 0.15663 | 0.89517                                                                                             | -0.34629 |
| H12                  | 0.27388 | 0.84467                                                                                             | -0.35883 |
| H13                  | 0.09896 | 0.61567                                                                                             | 0.30163  |
| H14                  | 0.99142 | 0.6781                                                                                              | 0.3508   |
| H15                  | 0.16152 | 0.54823                                                                                             | -0.02967 |
| C16                  | 0.90572 | 0.99517                                                                                             | 0.05663  |
| N17                  | 0.16993 | 0.17417                                                                                             | 0.07566  |
| C18                  | 0.15974 | 0.30837                                                                                             | -0.17939 |
| C19                  | 0.19089 | 0.40521                                                                                             | -0.19362 |
| C20                  | 0.27208 | 0.47078                                                                                             | -0.01989 |
| C21                  | 0.32136 | 0.43599                                                                                             | 0.16407  |
| C22                  | 0.28496 | 0.33848                                                                                             | 0.19765  |
| C23                  | 0.20056 | 0.27346                                                                                             | 0.04257  |
| C24                  | 0.40007 | 0.63658                                                                                             | -0.03113 |
| C25                  | 0.4314  | 0.7343                                                                                              | -0.03017 |
| H26                  | 0.10483 | 0.26146                                                                                             | -0.34629 |
| H27                  | 0.15533 | 0.42921                                                                                             | -0.35883 |
| H28                  | 0.38433 | 0.48329                                                                                             | 0.30163  |
| H29                  | 0.3219  | 0.31332                                                                                             | 0.3508   |



|     |         |         |          |
|-----|---------|---------|----------|
| H30 | 0.45177 | 0.61329 | -0.02967 |
| C31 | 0.00483 | 0.91055 | 0.05663  |
| N32 | 0.82583 | 0.99576 | 0.07566  |
| C33 | 0.69163 | 0.85137 | -0.17939 |
| C34 | 0.59479 | 0.78568 | -0.19362 |
| C35 | 0.52922 | 0.8013  | -0.01989 |
| C36 | 0.56401 | 0.88537 | 0.16407  |
| C37 | 0.66152 | 0.94648 | 0.19765  |
| C38 | 0.72654 | 0.9271  | 0.04257  |
| C39 | 0.36342 | 0.76349 | -0.03113 |
| C40 | 0.2657  | 0.6971  | -0.03017 |
| H41 | 0.73854 | 0.84337 | -0.34629 |
| H42 | 0.57079 | 0.72612 | -0.35883 |
| H43 | 0.51671 | 0.90104 | 0.30163  |
| H44 | 0.68668 | 0.00858 | 0.3508   |
| H45 | 0.38671 | 0.83848 | -0.02967 |
| C46 | 0.91055 | 0.90572 | 0.05663  |
| N47 | 0.99576 | 0.16993 | 0.07566  |
| C48 | 0.85137 | 0.15974 | -0.17939 |
| C49 | 0.78568 | 0.19089 | -0.19362 |
| C50 | 0.8013  | 0.27208 | -0.01989 |
| C51 | 0.88537 | 0.32136 | 0.16407  |
| C52 | 0.94648 | 0.28496 | 0.19765  |
| C53 | 0.9271  | 0.20056 | 0.04257  |
| C54 | 0.76349 | 0.40007 | -0.03113 |
| C55 | 0.6971  | 0.4314  | -0.03017 |
| H56 | 0.84337 | 0.10483 | -0.34629 |
| H57 | 0.72612 | 0.15533 | -0.35883 |
| H58 | 0.90104 | 0.38433 | 0.30163  |
| H59 | 0.00858 | 0.3219  | 0.3508   |
| H60 | 0.83848 | 0.45177 | -0.02967 |
| C61 | 0.09428 | 0.00483 | 0.05663  |
| N62 | 0.83007 | 0.82583 | 0.07566  |
| C63 | 0.84026 | 0.69163 | -0.17939 |
| C64 | 0.80911 | 0.59479 | -0.19362 |
| C65 | 0.72792 | 0.52922 | -0.01989 |
| C66 | 0.67864 | 0.56401 | 0.16407  |
| C67 | 0.71504 | 0.66152 | 0.19765  |
| C68 | 0.79944 | 0.72654 | 0.04257  |
| C69 | 0.59993 | 0.36342 | -0.03113 |
| C70 | 0.5686  | 0.2657  | -0.03017 |

|     |         |         |          |
|-----|---------|---------|----------|
| H71 | 0.89517 | 0.73854 | -0.34629 |
| H72 | 0.84467 | 0.57079 | -0.35883 |
| H73 | 0.61567 | 0.51671 | 0.30163  |
| H74 | 0.6781  | 0.68668 | 0.3508   |
| H75 | 0.54823 | 0.38671 | -0.02967 |
| C76 | 0.99517 | 0.08945 | 0.05663  |
| N77 | 0.17417 | 0.00424 | 0.07566  |
| C78 | 0.30837 | 0.14863 | -0.17939 |
| C79 | 0.40521 | 0.21432 | -0.19362 |
| C80 | 0.47078 | 0.1987  | -0.01989 |
| C81 | 0.43599 | 0.11463 | 0.16407  |
| C82 | 0.33848 | 0.05352 | 0.19765  |
| C83 | 0.27346 | 0.0729  | 0.04257  |
| C84 | 0.63658 | 0.23651 | -0.03113 |
| C85 | 0.7343  | 0.3029  | -0.03017 |
| H86 | 0.26146 | 0.15663 | -0.34629 |
| H87 | 0.42921 | 0.27388 | -0.35883 |
| H88 | 0.48329 | 0.09896 | 0.30163  |
| H89 | 0.31332 | 0.99142 | 0.3508   |
| H90 | 0.61329 | 0.16152 | -0.02967 |

**Table S3.** Unit cell parameters and fractional atomic coordinates for JUC-625 calculated based on the AA-stacked **kgd** net.

|                      |         |                                                                                                     |          |
|----------------------|---------|-----------------------------------------------------------------------------------------------------|----------|
| Space group          |         | <i>P6</i>                                                                                           |          |
| Calculated unit cell |         | $a = b = 16.3501 \text{ \AA}, c = 3.915 \text{ \AA}, \alpha = \beta = 90^\circ, \gamma = 120^\circ$ |          |
| Measured unit cell   |         | $a = b = 16.3492 \text{ \AA}, c = 3.921 \text{ \AA}, \alpha = \beta = 90^\circ, \gamma = 120^\circ$ |          |
| Pawley refinement    |         | $R_p = 3.68\%, R_{wp} = 4.68\%$                                                                     |          |
| atoms                | x       | y                                                                                                   | z        |
| C1                   | 0.08945 | 0.09428                                                                                             | 0.05663  |
| N2                   | 0.00424 | 0.83007                                                                                             | 0.07566  |
| C3                   | 0.14863 | 0.84026                                                                                             | -0.17939 |
| C4                   | 0.21432 | 0.80911                                                                                             | -0.19362 |
| C5                   | 0.1987  | 0.72792                                                                                             | -0.01989 |
| C6                   | 0.11463 | 0.67864                                                                                             | 0.16407  |
| C7                   | 0.05352 | 0.71504                                                                                             | 0.19765  |
| C8                   | 0.0729  | 0.79944                                                                                             | 0.04257  |
| N9                   | 0.23651 | 0.59993                                                                                             | -0.03113 |
| C10                  | 0.3029  | 0.5686                                                                                              | -0.03017 |
| H11                  | 0.15663 | 0.89517                                                                                             | -0.34629 |

|     |         |         |          |
|-----|---------|---------|----------|
| H12 | 0.27388 | 0.84467 | -0.35883 |
| H13 | 0.09896 | 0.61567 | 0.30163  |
| H14 | 0.99142 | 0.6781  | 0.3508   |
| C15 | 0.90572 | 0.99517 | 0.05663  |
| N16 | 0.16993 | 0.17417 | 0.07566  |
| C17 | 0.15974 | 0.30837 | -0.17939 |
| C18 | 0.19089 | 0.40521 | -0.19362 |
| C19 | 0.27208 | 0.47078 | -0.01989 |
| C20 | 0.32136 | 0.43599 | 0.16407  |
| C21 | 0.28496 | 0.33848 | 0.19765  |
| C22 | 0.20056 | 0.27346 | 0.04257  |
| N23 | 0.40007 | 0.63658 | -0.03113 |
| C24 | 0.4314  | 0.7343  | -0.03017 |
| H25 | 0.10483 | 0.26146 | -0.34629 |
| H26 | 0.15533 | 0.42921 | -0.35883 |
| H27 | 0.38433 | 0.48329 | 0.30163  |
| H28 | 0.3219  | 0.31332 | 0.3508   |
| C29 | 0.00483 | 0.91055 | 0.05663  |
| N30 | 0.82583 | 0.99576 | 0.07566  |
| C31 | 0.69163 | 0.85137 | -0.17939 |
| C32 | 0.59479 | 0.78568 | -0.19362 |
| C33 | 0.52922 | 0.8013  | -0.01989 |
| C34 | 0.56401 | 0.88537 | 0.16407  |
| C35 | 0.66152 | 0.94648 | 0.19765  |
| C36 | 0.72654 | 0.9271  | 0.04257  |
| N37 | 0.36342 | 0.76349 | -0.03113 |
| C38 | 0.2657  | 0.6971  | -0.03017 |
| H39 | 0.73854 | 0.84337 | -0.34629 |
| H40 | 0.57079 | 0.72612 | -0.35883 |
| H41 | 0.51671 | 0.90104 | 0.30163  |
| H42 | 0.68668 | 0.00858 | 0.3508   |
| C43 | 0.91055 | 0.90572 | 0.05663  |
| N44 | 0.99576 | 0.16993 | 0.07566  |
| C45 | 0.85137 | 0.15974 | -0.17939 |
| C46 | 0.78568 | 0.19089 | -0.19362 |
| C47 | 0.8013  | 0.27208 | -0.01989 |
| C48 | 0.88537 | 0.32136 | 0.16407  |
| C49 | 0.94648 | 0.28496 | 0.19765  |
| C50 | 0.9271  | 0.20056 | 0.04257  |
| N51 | 0.76349 | 0.40007 | -0.03113 |
| C52 | 0.6971  | 0.4314  | -0.03017 |

|     |         |         |          |
|-----|---------|---------|----------|
| H53 | 0.84337 | 0.10483 | -0.34629 |
| H54 | 0.72612 | 0.15533 | -0.35883 |
| H55 | 0.90104 | 0.38433 | 0.30163  |
| H56 | 0.00858 | 0.3219  | 0.3508   |
| C57 | 0.09428 | 0.00483 | 0.05663  |
| N58 | 0.83007 | 0.82583 | 0.07566  |
| C59 | 0.84026 | 0.69163 | -0.17939 |
| C60 | 0.80911 | 0.59479 | -0.19362 |
| C61 | 0.72792 | 0.52922 | -0.01989 |
| C62 | 0.67864 | 0.56401 | 0.16407  |
| C63 | 0.71504 | 0.66152 | 0.19765  |
| C64 | 0.79944 | 0.72654 | 0.04257  |
| N65 | 0.59993 | 0.36342 | -0.03113 |
| C66 | 0.5686  | 0.2657  | -0.03017 |
| H67 | 0.89517 | 0.73854 | -0.34629 |
| H68 | 0.84467 | 0.57079 | -0.35883 |
| H69 | 0.61567 | 0.51671 | 0.30163  |
| H70 | 0.6781  | 0.68668 | 0.3508   |
| C71 | 0.99517 | 0.08945 | 0.05663  |
| N72 | 0.17417 | 0.00424 | 0.07566  |
| C73 | 0.30837 | 0.14863 | -0.17939 |
| C74 | 0.40521 | 0.21432 | -0.19362 |
| C75 | 0.47078 | 0.1987  | -0.01989 |
| C76 | 0.43599 | 0.11463 | 0.16407  |
| C77 | 0.33848 | 0.05352 | 0.19765  |
| C78 | 0.27346 | 0.0729  | 0.04257  |
| N79 | 0.63658 | 0.23651 | -0.03113 |
| C80 | 0.7343  | 0.3029  | -0.03017 |
| H81 | 0.26146 | 0.15663 | -0.34629 |
| H82 | 0.42921 | 0.27388 | -0.35883 |
| H83 | 0.48329 | 0.09896 | 0.30163  |
| H84 | 0.31332 | 0.99142 | 0.3508   |



## Section S9. References

- [1] B. C. Patra, S. Khilari, R. N. Manna, S. Mondal, D. Pradhan, A. Pradhan, A. Bhaumik, *ACS Catalysis* 2017, 7, 6120-6127.
- [2] Q. Zhao, S. Chen, H. Ren, C. Chen, W. Yang, *Industrial & Engineering Chemistry Research* 2021, 60, 11070-11078.
- [3] D. Zhou, X. Tan, H. Wu, L. Tian, M. Li, *Angew Chem Int Ed Engl* 2019, 58, 1376-1381.
- [4] S. Maiti, A. R. Chowdhury, A. K. Das, *ChemNanoMat* 2019, 6, 99-106.
- [5] S. Ruidas, B. Mohanty, P. Bhanja, E. S. Erakulan, R. Thapa, P. Das, A. Chowdhury, S. K. Mandal, B. K. Jena, A. Bhaumik, *ChemSusChem* 2021, 14, 5057-5064.
